# Supplementary material for: Stc1: A Critical Link between RNAi and Chromatin Modification Required for Heterochromatin Integrity
Source: PubMed Central journal article supplement (PMC2875855; doi:10.1016/j.cell.2010.01.038), 2010-03-05
Supplement: mmc1.pdf [file mmc1.pdf]

**Table S1. List of yeast strains.**

| Strain  | Genotype                                                                                   | Figure  |
|---------|--------------------------------------------------------------------------------------------|---------|
| FY1180  | <i>h+</i> <i>ade6-210 leu1-32 ura4-D18 otr1R(Sph1):ade6<sup>+</sup></i>                    | 1, S1   |
| FY8898  | <i>hA clr4Δ::KanR ade6-210 leu1-32 lys1::NatR otr1R(Sph1):ade6<sup>+</sup></i>             | 1, S1   |
| FY8896  | <i>hA swi6Δ::KanR ade6-210 leu1-32 lys1::NatR otr1R(Sph1):ade6<sup>+</sup></i>             | 1       |
| FY8586  | <i>dcr1Δ::NatR ade6-210 ura4-D18/DSE otr1R(Sph1):ade6<sup>+</sup></i>                      | 1       |
| FY13480 | <i>hA stc1Δ::KanR ade6-210 leu1-32 lys1::NatR otr1R(Sph1):ade6<sup>+</sup></i>             | 1, S1   |
| FY4841  | <i>h- ura4DSE leu1-32 ade6-210 his3-D1 arg3-D4 otr1R(Sph1):ura4<sup>+</sup></i>            | 1       |
| FY707   | <i>hA clr4-s5 ura4-DS/E leu1-32 ade6-210 otr1R(Sph1):ura4<sup>+</sup></i>                  | 1       |
| FY8538  | <i>h+ dcr1Δ::KanR ura4-DS/E leu1-32 ade6-210 his3-D1 otr1R(Sph1):ura4<sup>+</sup></i>      | 1       |
| FY13206 | <i>h+ stc1Δ::KanR ura4-DS/E leu1-32 ade6-210 otr1R(Sph1):ura4<sup>+</sup></i>              | 1       |
| FY511   | <i>h90 mat3-M:ura4<sup>+</sup> ade6-210 leu1-32 ura4-D18</i>                               | 2       |
| FY9299  | <i>h90 mat3-M:ura4<sup>+</sup> dcr1Δ::NatR ade6-210 leu1-32 ura4-D18</i>                   | 2       |
| FY13208 | <i>h90 mat3-M:ura4<sup>+</sup> stc1Δ::KanR ade6-210 leu1-32 ura4-D18</i>                   | 2       |
| FY7429  | <i>h90 mat3-M:ura4<sup>+</sup> clr4Δ:leu2<sup>+</sup> ade6-210 leu1-32 ura4-D18</i>        | 2       |
| FY14932 | <i>h90 dos1::kanR mat3-M:ura4<sup>+</sup> ade6-210 leu1-32 ura4-D18</i>                    | 2       |
| FY14933 | <i>h90 dos2::kanR mat3-M:ura4<sup>+</sup> ade6-210 leu1-32 ura4-D18</i>                    | 2       |
| FY14934 | <i>h90 rik1::kanR mat3-M:ura4<sup>+</sup> ade6-210 leu1-32 ura4-D18</i>                    | 2       |
| FY14937 | <i>h90 mat3-M:ura4<sup>+</sup> dcr1Δ::NatR ade6-210 leu1-32 ura4-D18 [establishment]</i>   | 2       |
| FY14938 | <i>h90 mat3-M:ura4<sup>+</sup> stc1Δ::KanR ade6-210 leu1-32 ura4-D18 [establishment]</i>   | 2       |
| FY8676  | <i>h- ura4:3xgbs-ade6<sup>+</sup> ade6-DNN</i>                                             | 2       |
| FY10084 | <i>GBD-clr4-Δcd-HygR ura4:3xgbs-ade6<sup>+</sup> ade6-DNN</i>                              | 2       |
| FY14941 | <i>dcr1Δ::NatR GBD-clr4-Δcd-HygR ura4:3xgbs-ade6<sup>+</sup> ade6-DNN [maintenance]</i>    | 2       |
| FY14942 | <i>rik1Δ::KanR GBD-clr4-Δcd-HygR ura4:3xgbs-ade6<sup>+</sup> ade6-DNN [maintenance]</i>    | 2       |
| FY14943 | <i>dos1Δ::KanR GBD-clr4-Δcd-HygR ura4:3xgbs-ade6<sup>+</sup> ade6-DNN [maintenance]</i>    | 2       |
| FY14945 | <i>dos2Δ::KanR GBD-clr4-Δcd-HygR ura4:3xgbs-ade6<sup>+</sup> ade6-DNN [maintenance]</i>    | 2       |
| FY13982 | <i>stc1Δ::KanR GBD-clr4-Δcd-HygR ura4:3xgbs-ade6<sup>+</sup> ade6-DNN [maintenance]</i>    | 2       |
| FY14951 | <i>dcr1Δ::NatR GBD-clr4-Δcd-HygR ura4:3xgbs-ade6<sup>+</sup> ade6-DNN [establishment]</i>  | 2       |
| FY14952 | <i>rik1Δ::KanR GBD-clr4-Δcd-HygR ura4:3xgbs-ade6<sup>+</sup> ade6-DNN [establishment]</i>  | 2       |
| FY14953 | <i>dos1Δ::KanR GBD-clr4-Δcd-HygR ura4:3xgbs-ade6<sup>+</sup> ade6-DNN [establishment]</i>  | 2       |
| FY14954 | <i>dos2Δ::KanR GBD-clr4-Δcd-HygR ura4:3xgbs-ade6<sup>+</sup> ade6-DNN [establishment]</i>  | 2       |
| FY14189 | <i>stc1Δ::KanR GBD-clr4-Δcd-HygR ura4:3xgbs-ade6<sup>+</sup> ade6-DNN [establishment]</i>  | 2       |
| FY13721 | <i>h+ stc1-flag-NatR ade6-210 leu1-32 ura4-D18 otr1R(Sph1):ade6<sup>+</sup></i>            | 3, 4, 6 |
| FY13970 | <i>h+ dos2-HA-NatR ade6-216 leu1-32 ura4-D18 imr1R(Nco1):ura4<sup>+</sup></i>              | 3       |
| FY14104 | <i>stc1-flag-NatR dos2-HA-NatR ade6-210 leu1-32 ura4-D18 otr1R(Sph1):ade6<sup>+</sup></i>  | 3,6     |
| FY8120  | <i>h90 rik1-myc-KanR ade6-216 leu1-32 ura4-DSE Kint2::ura4<sup>+</sup></i>                 | 3       |
| FY13825 | <i>stc1-flag-NatR rik1-myc-KanR ade6-210 leu1-32 ura4-D18 otr1R(Sph1):ade6<sup>+</sup></i> | 3,6     |
| FY8635  | <i>h+ myc-clr4 ade6-210 leu1-32 ura4-D18 otr1R(Sph1):ade6<sup>+</sup></i>                  | 3       |
| FY14955 | <i>h<sup>+</sup> stc1-flag-HygR myc-clr4 ade6-210 leu1-32 ura4-D18/DSE</i>                 | 3,6     |

|         |                                                                                                                |       |
|---------|----------------------------------------------------------------------------------------------------------------|-------|
| FY8216  | <i>h+ myc-ago1 ade6-704 leu1-32 ura4-D18</i>                                                                   | 3     |
| FY13844 | <i>stc1-flag-NatR myc-ago1 ade6-210 leu1-32 ura4-D18 otr1R(Sph1):ade6<sup>+</sup></i>                          | 3,6   |
| FY14402 | <i>stc1-flag-NatR myc-ago1 clr4Δ::KanR ade6-210 leu1-32 ura4-D18</i>                                           | 3     |
| FY14404 | <i>stc1-flag-NatR myc-ago1 dcr1Δ::KanR ade6-210 leu1-32 ura4-D18</i>                                           | 3     |
| FY14406 | <i>stc1-flag-NatR myc-ago1 rik1Δ::KanR ade6-210 leu1-32 ura4-D18</i>                                           | 3     |
| FY14408 | <i>stc1-flag-NatR myc-ago1 dos1Δ::KanR ade6-210 leu1-32 ura4-D18</i>                                           | 3     |
| FY15017 | <i>stc1-flag-HygR myc-clr4 dos1Δ::KanR ade6-210 leu1-32 ura4-D18/DSE</i>                                       | 3     |
| FY15019 | <i>stc1-flag-HygR myc-clr4 dos2Δ::KanR ade6-210 leu1-32 ura4-D18/DSE</i>                                       | 3     |
| FY15021 | <i>stc1-flag-HygR myc-clr4 rik1Δ::KanR ade6-210 leu1-32 ura4-D18/DSE</i>                                       | 3     |
| FY15023 | <i>stc1-flag-HygR myc-clr4 dcr1Δ::NatR ade6-210 leu1-32 ura4-D18/DSE</i>                                       | 3     |
| FY15357 | <i>stc1-flag-HygR myc-clr4 ago1Δ::KanR ade6-210 leu1-32</i>                                                    | 3     |
| FY14598 | <i>stc1-flag-HygR rik1-myc-KanR ade6-210 leu1-32 ura4-D18/DSE</i>                                              | 3     |
| FY14600 | <i>h<sup>+</sup> stc1-flag-HygR rik1-myc-KanR dcr1Δ::NatR ade6-210 leu1-32 ura4-D18/DSE</i>                    | 3     |
| FY14603 | <i>h<sup>+</sup> stc1-flag-HygR rik1-myc-KanR clr4Δ::NatR ade6-210 leu1-32 ura4-D18/DSE</i>                    | 3     |
| FY14604 | <i>h<sup>+</sup> stc1-flag-HygR rik1-myc-KanR dos1Δ::NatR ade6-210 leu1-32 ura4-D18/DSE</i>                    | 3     |
| FY14606 | <i>h<sup>+</sup> stc1-flag-HygR rik1-myc-KanR dos2Δ::NatR ade6-210 leu1-32 ura4-D18/DSE</i>                    | 3     |
| FY15359 | <i>h<sup>+</sup> stc1-flag-HygR rik1-myc-KanR ago1Δ::KanR ade6-210 leu1-32</i>                                 | 3     |
| FY14410 | <i>stc1-flag-NatR dos2-HA-NatR clr4Δ::KanR ade6-210 leu1-32 ura4-D18</i>                                       | 3     |
| FY14412 | <i>stc1-flag-NatR dos2-HA-NatR dcr1Δ::KanR ade6-210 leu1-32 ura4-D18</i>                                       | 3     |
| FY14414 | <i>stc1-flag-NatR dos2-HA-NatR rik1Δ::KanR ade6-210 leu1-32 ura4-D18</i>                                       | 3     |
| FY14416 | <i>stc1-flag-NatR dos2-HA-NatR dos1Δ::KanR ade6-210 leu1-32 ura4-D18</i>                                       | 3     |
| FY15361 | <i>stc1-flag-NatR dos2-HA-NatR ago1Δ::KanR ade6-210 leu1-32</i>                                                | 3     |
| FY15669 | <i>h90 flag-clr4 myc-ago1 ade6-210 leu1-32 ura4-D18/DSE</i>                                                    | 3     |
| FY15670 | <i>h90 flag-clr4 myc-ago1 stc1Δ::NatR ade6-210 leu1-32 ura4-D18/DSE</i>                                        | 3     |
| FY15671 | <i>h90 flag-clr4 myc-ago1 dcr1Δ::NatR ade6-210 leu1-32 ura4-D18/DSE</i>                                        | 3     |
| FY14177 | <i>h+ stc1-GFP-NatR ade6-210 leu1-32 ura4-D18</i>                                                              | 4     |
| FY14380 | <i>stc1-GFP-NatR clr4Δ::KanR ade6-210 leu1-32 ura4-D18/DSE</i>                                                 | 4     |
| FY14381 | <i>stc1-GFP-NatR dcr1Δ::KanR ade6-210 leu1-32 ura4-D18/DSE</i>                                                 | 4     |
| FY13562 | <i>h+ stc1-flag-NatR clr4Δ::KanR ade6-210 leu1-32 ura4-D18 otr1R(Sph1):ade6<sup>+</sup></i>                    | 4     |
| FY13563 | <i>h+ stc1-flag-NatR dcr1Δ::KanR ade6-210 leu1-32 ura4-D18 otr1R(Sph1):ade6<sup>+</sup></i>                    | 4     |
| FY15005 | <i>h+ stc1-flag-NatR ago1Δ::KanR ade6-210 leu1-32 ura4-D18 otr1R(Sph1):ade6<sup>+</sup></i>                    |       |
| FY14106 | <i>stc1-flag-NatR clr3Δ::KanR ade6-210 leu1-32 ura4-D18 otr1R(Sph1):ade6<sup>+</sup></i>                       | 4     |
| FY14108 | <i>stc1-flag-NatR clr3Δ::KanR dcr1Δ::NatR ade6-210 leu1-32 ura4-D18 otr1R(Sph1):ade6<sup>+</sup></i>           | 4     |
| FY9932  | <i>h- flag-ago1--KanR ade6-210 leu1-32 ura4-D18</i>                                                            | 4     |
| FY9733  | <i>h90 rik1-flag-NatR ade6-210 leu1-32 ura4-D18 otr1R(Sph1):ade6<sup>+</sup></i>                               | 4, S4 |
| FY8677  | <i>h+ ura4:4xTetO-ade6<sup>+</sup> ade6-DNN leu1-32</i>                                                        | 5,6   |
| FY14394 | <i>h+ TetR<sup>off</sup>-flag-stc1-leu1<sup>+</sup> ura4:4xTetO-ade6<sup>+</sup> ade6-DNN leu1-32</i>          | 5,6   |
| FY15143 | <i>TetR<sup>off</sup>-flag-stc1-leu1<sup>+</sup> ura4:4xTetO-ade6<sup>+</sup> dcr1Δ::NatR ade6-DNN leu1-32</i> | 5     |

|         |                                                                                                                 |       |
|---------|-----------------------------------------------------------------------------------------------------------------|-------|
| FY15144 | <i>TetR<sup>off</sup>-flag-stc1-leu1<sup>+</sup> ura4:4xTetO-ade6<sup>+</sup> ago1Δ::KanR ade6-DNN leu1-32</i>  | 5     |
| FY15145 | <i>TetR<sup>off</sup>-flag-stc1-leu1<sup>+</sup> ura4:4xTetO-ade6<sup>+</sup> chp1Δ::KanR ade6-DNN leu1-32</i>  | 5     |
| FY15146 | <i>TetR<sup>off</sup>-flag-stc1-leu1<sup>+</sup> ura4:4xTetO-ade6<sup>+</sup> cid12Δ::NatR ade6-DNN leu1-32</i> | 5     |
| FY15147 | <i>TetR<sup>off</sup>-flag-stc1-leu1<sup>+</sup> ura4:4xTetO-ade6<sup>+</sup> rdp1Δ::NatR ade6-DNN leu1-32</i>  | 5     |
| FY15148 | <i>TetR<sup>off</sup>-flag-stc1-leu1<sup>+</sup> ura4:4xTetO-ade6<sup>+</sup> clr4Δ::NatR ade6-DNN leu1-32</i>  | 5     |
| FY15149 | <i>TetR<sup>off</sup>-flag-stc1-leu1<sup>+</sup> ura4:4xTetO-ade6<sup>+</sup> sir2Δ::NatR ade6-DNN leu1-32</i>  | 5     |
| FY15150 | <i>TetR<sup>off</sup>-flag-stc1-leu1<sup>+</sup> ura4:4xTetO-ade6<sup>+</sup> rik1Δ::KanR ade6-DNN leu1-32</i>  | 5     |
| FY15151 | <i>TetR<sup>off</sup>-flag-stc1-leu1<sup>+</sup> ura4:4xTetO-ade6<sup>+</sup> dos1Δ::KanR ade6-DNN leu1-32</i>  | 5     |
| FY15152 | <i>TetR<sup>off</sup>-flag-stc1-leu1<sup>+</sup> ura4:4xTetO-ade6<sup>+</sup> dos2Δ::KanR ade6-DNN leu1-32</i>  | 5     |
| FY15012 | <i>h+ stc1-K100A-flag-NatR ade6-210 leu1-32 ura4-D18 otr1R(Sph1):ade6<sup>+</sup></i>                           | 6, S5 |
| FY15014 | <i>h+ stc1-R116A-flag-NatR ade6-210 leu1-32 ura4-D18 otr1R(Sph1):ade6<sup>+</sup></i>                           | 6, S5 |
| FY15366 | <i>stc1-K100A-flag-NatR dos2-HA-NatR ade6-210 leu1-32 ura4-D18</i>                                              | 6     |
| FY15368 | <i>stc1-R116A-flag-NatR dos2-HA-NatR ade6-210 leu1-32 ura4-D18</i>                                              | 6     |
| FY15140 | <i>stc1-K100A-flag-NatR rik1-myc-KanR ade6-210 leu1-32 ura4-D18</i>                                             | 6     |
| FY15142 | <i>stc1-R116A-flag-NatR rik1-myc-KanR ade6-210 leu1-32 ura4-D18</i>                                             | 6     |
| FY15162 | <i>stc1-K100A-flag-NatR myc-clr4 ade6-210 leu1-32 ura4-D18/DSE</i>                                              | 6     |
| FY15164 | <i>stc1-R116A-flag-NatR myc-clr4 ade6-210 leu1-32 ura4-D18/DSE</i>                                              | 6     |
| FY15225 | <i>stc1-K100A-flag-NatR myc-ago1 ade6-210 leu1-32 ura4-D18 otr1R(Sph1):ade6<sup>+</sup></i>                     | 6     |
| FY15227 | <i>stc1-R116A-flag-NatR myc-ago1 ade6-210 leu1-32 ura4-D18 otr1R(Sph1):ade6<sup>+</sup></i>                     | 6     |
| FY15513 | <i>h+ TetR<sup>off</sup>-flag-stc1-K100A-leu1<sup>+</sup> ura4:4xTetO-ade6<sup>+</sup> ade6-DNN leu1-32</i>     | 6     |
| FY15515 | <i>h+ TetR<sup>off</sup>-flag-stc1-R116A-leu1<sup>+</sup> ura4:4xTetO-ade6<sup>+</sup> ade6-DNN leu1-32</i>     | 6     |
| FY1863  | <i>tel1:his3 ade6-210 leu1-32 ura4-D18 his3-D1 otr1R(Sph1):ade6<sup>+</sup></i>                                 | S2    |
| FY1966  | <i>clr4-S5 tel1:his3 ade6-210 leu1-32 ura4-D18 his3-D1 otr1R(Sph1):ade6<sup>+</sup></i>                         | S2    |
| FY2506  | <i>rik1Δ::leu2+ tel1:his3 ade6-210 leu1-32 ura4-DSE his3-D1 otr1R(Sph1):ade6<sup>+</sup></i>                    | S2    |
| FY15382 | <i>dcr1Δ::NatR tel1:his3 ade6-210 leu1-32 ura4-D18/DSE his3-D1</i>                                              | S2    |
| FY15384 | <i>stc1Δ::NatR tel1:his3 ade6-210 leu1-32 ura4-D18/DSE his3-D1</i>                                              | S2    |
| FY15386 | <i>dos1Δ::NatR tel1:his3 ade6-210 leu1-32 ura4-D18/DSE his3-D1</i>                                              | S2    |
| FY15388 | <i>dos2Δ::NatR tel1:his3 ade6-210 leu1-32 ura4-D18/DSE his3-D1</i>                                              | S2    |
| FY14359 | <i>h- GFP-dos1-ura4<sup>+</sup> leu1-32 ura4-D18</i>                                                            | S3    |
| FY14545 | <i>stc1-flag-NatR GFP-dos1-ura4<sup>+</sup> ade6-210 leu1-32 ura4-D18 otr1R(Sph1):ade6<sup>+</sup></i>          | S3    |
| FY8923  | <i>h+ cid12-HA-KanR ade6-210 leu1-32 ura4-DSE arg3D4 his3D1</i>                                                 | S3    |
| FY13827 | <i>stc1-flag-NatR cid12-HA-KanR ade6-210 leu1-32 ura4-D18 otr1R(Sph1):ade6<sup>+</sup></i>                      | S3    |
| FY12406 | <i>h+ rdp1-HA-KanR ade6-210 leu1-32 ura4-D18 otr1R(Sph1):ade6<sup>+</sup></i>                                   | S3    |
| FY13829 | <i>stc1-flag-NatR rdp1-HA-KanR ade6-210 leu1-32 ura4-D18 otr1R(Sph1):ade6<sup>+</sup></i>                       | S3    |
| FY12191 | <i>h+ rdp1-myc-hygR ade6-210 leu1-32 ura4-DSE/D18</i>                                                           | S3    |
| FY15351 | <i>chp1-flag-KanR rdp1-myc-hygR ade6-210/216 leu1-32 ura4-DSE/D18</i>                                           | S3    |
| FY15459 | <i>chp1-flag-KanR rdp1-myc-hygR stc1Δ::NatR ade6-210/216 leu1-32 ura4-DSE</i>                                   | S3    |
| FY15461 | <i>chp1-flag-KanR rdp1-myc-hygR dcr1Δ::NatR ade6-210/216 leu1-32 ura4-DSE</i>                                   | S3    |
| FY14669 | <i>rik1-flag-NatR GFP-dos1-ura4<sup>+</sup> ade6-210 leu1-32 ura4-D18 otr1R(Sph1):ade6<sup>+</sup></i>          | S3    |

|         |                                                                                                                              |    |
|---------|------------------------------------------------------------------------------------------------------------------------------|----|
| FY14844 | <i>rik1-flag-NatR GFP-dos1-ura4<sup>+</sup> stc1Δ::KanR ade6-210 leu1-32 ura4-D18</i><br><i>otr1R(Sph1):ade6<sup>+</sup></i> | S3 |
| FY14678 | <i>dos2-flag-NatR GFP-dos1-ura4<sup>+</sup> ade6-210 leu1-32 ura4-D18 otr1R(Sph1):ade6<sup>+</sup></i>                       | S3 |
| FY14852 | <i>dos2-flag-NatR GFP-dos1-ura4<sup>+</sup> stc1Δ::KanR ade6-210 leu1-32 ura4-D18</i><br><i>otr1R(Sph1):ade6<sup>+</sup></i> | S3 |
| FY14665 | <i>h90 stc1-flag-HygR mat3-M::ura4<sup>+</sup> leu1-32 ura4-D18</i>                                                          | S4 |
| FY14758 | <i>h90 stc1-flag-HygR dcr1Δ::NatR mat3-M::ura4<sup>+</sup> leu1-32 ura4-D18</i>                                              | S4 |
| FY15363 | <i>h90 stc1-flag-HygR clr4Δ::leu2<sup>+</sup> mat3-M::ura4<sup>+</sup> leu1-32 ura4-D18</i>                                  | S4 |
| FY8119  | <i>h90 flag-clr4 ade6-210 leu1-32 ura4-DSE Kint2::ura4</i>                                                                   | S4 |
| FY14111 | <i>h+ dos2-flag-NatR ade6-210 leu1-32 ura4-D18 otr1R(Sph1):ade6<sup>+</sup></i>                                              | S4 |
| FY15624 | <i>stc1-flag-HygR rik1-flag-NatR ade6-210 leu1-32 ura4-D18 otr1R(Sph1):ade6<sup>+</sup></i>                                  | S4 |
| FY15392 | <i>stc1-flag-NatR GBD-clr4-Δcd-HygR ura4:3xgbs-ade6<sup>+</sup> ade6-DNN [establishment]</i>                                 | S5 |
| FY15395 | <i>stc1-K100A-flag-NatR GBD-clr4-Δcd-HygR ura4:3xgbs-ade6<sup>+</sup> ade6-DNN</i><br><i>[establishment]</i>                 | S5 |
| FY15398 | <i>stc1-R116A-flag-NatR GBD-clr4-Δcd-HygR ura4:3xgbs-ade6<sup>+</sup> ade6-DNN</i><br><i>[establishment]</i>                 | S5 |

**Table S2. List of primers used in this study.**

---

**qPCR**

|               |                           |
|---------------|---------------------------|
| q_cen(dg)_FOR | AATTGTGGTGGTGTGGTAATAC    |
| q_cen(dg)_REV | GGGTTTCATCGTTTCCATTGAG    |
| q_ade6_FOR    | ATGCTTATCCTACAACCTGAGACC  |
| q_ade6_REV    | TGAATTGAGAAGGGAAGACGAG    |
| q_ura4_FOR    | CGTGGTCTCTTGCT TTGG       |
| q_ura4_REV    | GTAGTCGCTTTGAAGGTTAGG     |
| q_act_FOR     | GGTTTCGCTGGAGATGATG       |
| q_act_REV     | ATACCACGCTTGCTTTGAG       |
| q_ura4-5'_FOR | TCGCAGACATTGGAAATACC      |
| q_ura4-5'_REV | ATGGCAATTTGTGATATGAGC     |
| q_tlh_FOR     | GGATAAGCCAATCATCGTTGAG    |
| q_tlh_REV     | GTAGTTGACGCTCCTTGGAAG     |
| q_mat_FOR     | GTCCGAGGCAATACAACCTTTGG   |
| q_mat_REV     | GGTTGACAGTAGGAGATATTTACAG |

**Northern probes**

censiRNAs

|      |                             |
|------|-----------------------------|
| IK8  | ATTCCTTTCTGAACCTCTCTGTTAT   |
| IK9  | TTTGATGCCCATGTTTCATTCCACTTG |
| IK10 | GGGAGTACATCATTCCCTACTTCGATA |

|       |                          |
|-------|--------------------------|
| snR58 | GATGAAATTCAGAAGTCTAGCATC |
|-------|--------------------------|

---
